# Supplementary material for: Fabrication and photoelectrochemical properties of ZnS/Au/TiO2 nanotube array films
Source: Royal Society of Chemistry journal article supplement (doi:10.1039/c3cp43572e), 2013-01-01
Supplement: c3cp43572e.pdf [file c3cp43572e.pdf]

## Supplementary information

### Fabrication and photoelectrochemical properties of ZnS/Au/TiO<sub>2</sub> nanotube array films

By Yan-feng Zhu, Juan Zhang, Lu Xu, Ya Guo, Xiao-Ping Wang, Rong-gui Du\*,  
Chang-Jian Lin

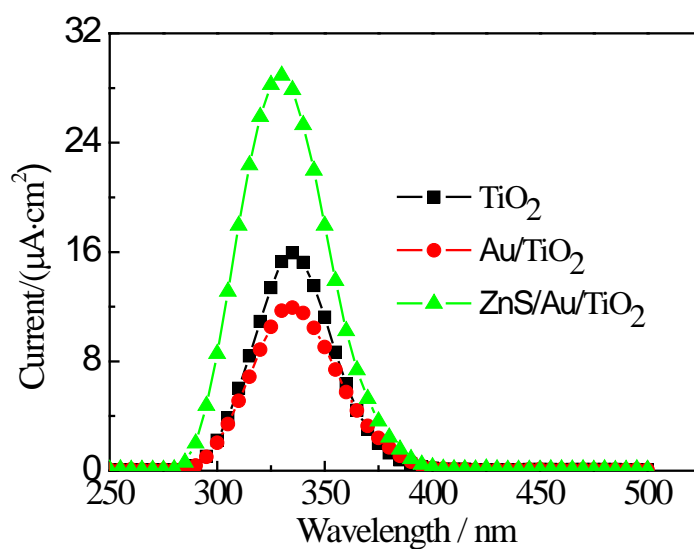

**Fig.S1** Photocurrent spectra of photoanodes with different nanotube films

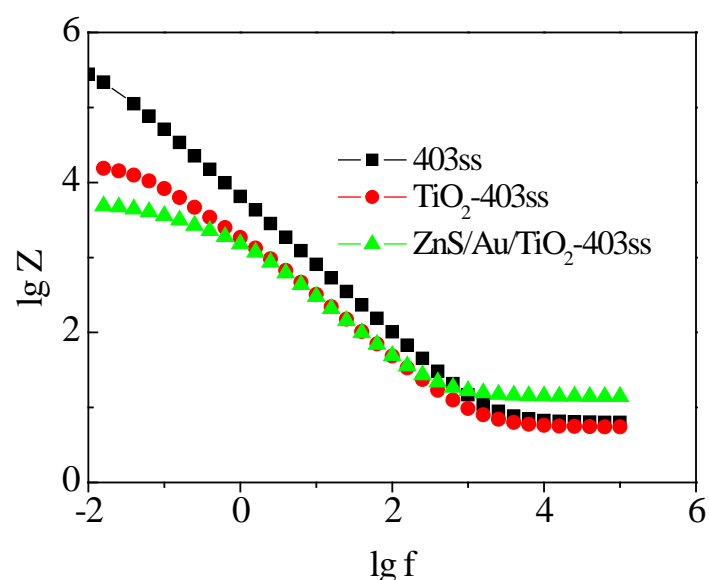

**Fig. S2** The EIS results Bode- $|Z|$  versus frequency.

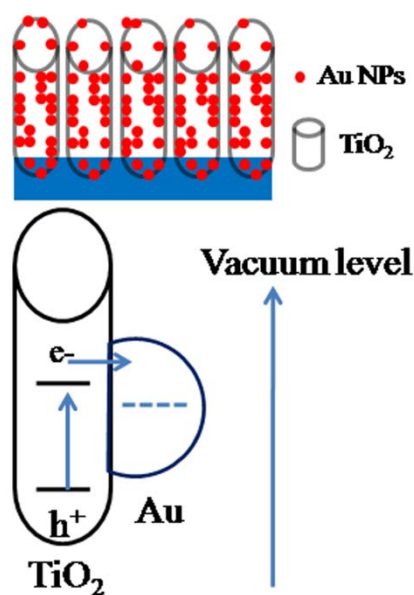

**Fig. S3** Schematic diagrams of charge transfer mechanism in the Au/ $\text{TiO}_2$  nanotube array film.
